# Supplementary material for: Ice as a Green-Structure-Directing Agent in the Synthesis of Macroporous MWCNTs and Chondroitin Sulphate Composites
Source: PubMed Central journal article supplement (PMC5506963; doi:10.3390/ma10040355), 2017-03-28
Supplement: materials-10-00355-s001.pdf [file materials-10-00355-s001.pdf]

# Supplementary Materials: Ice as a Green-Structure-Directing Agent in the Synthesis of Macroporous MWCNTs and Chondroitin Sulfate Composites

Stefania Nardecchia, María Concepción Serrano, Sara García-Argüelles, Marcelo E. H. Maia Da Costa, María Luisa Ferrer and María C. Gutiérrez

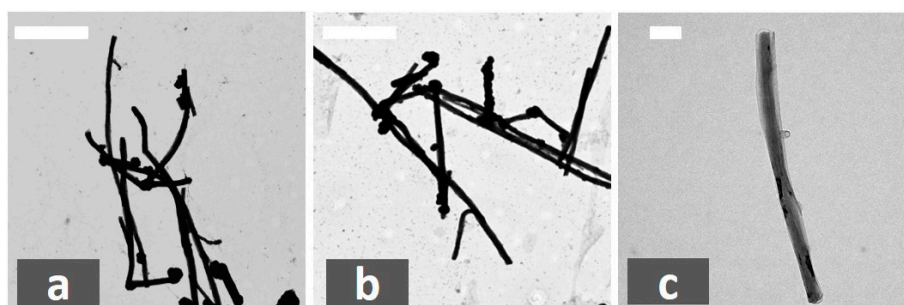

**Figure S1.** Representative TEM images of pristine (a), LN (b) and SN (c) MWCNTs. Scale bars represent 2 (a,b) and 0.2 (c)  $\mu\text{m}$ .

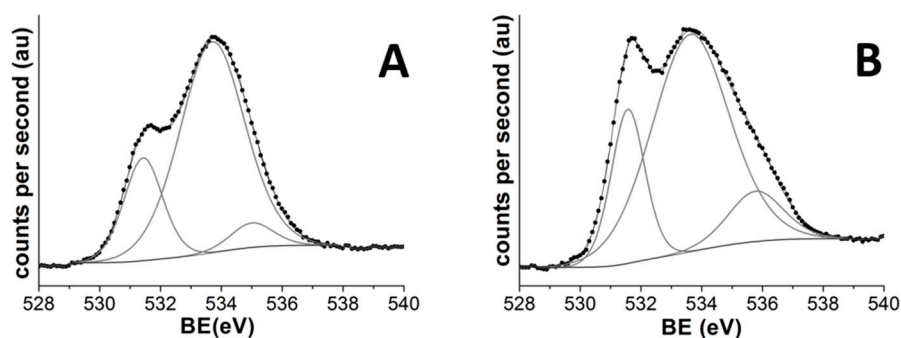

**Figure S2.** XPS spectra of O1s core level of LN (A) and SN (B) MWCNTs.

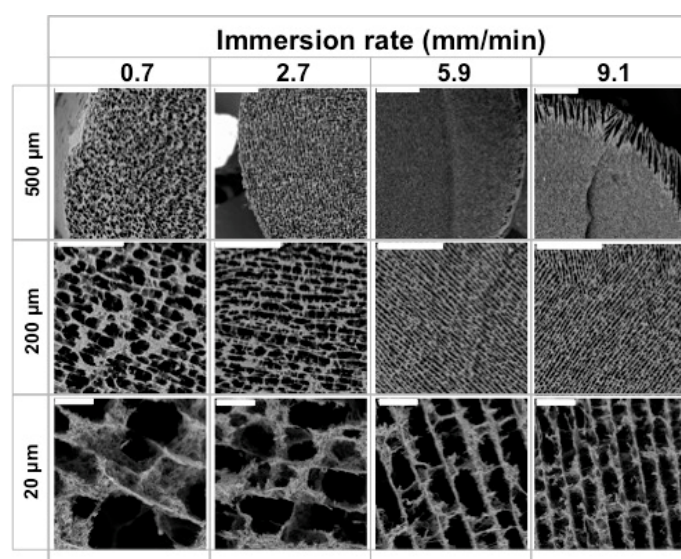

**Figure S3.** SEM images of cross-sectioned (perpendicular to the freezing direction) CS1LN6 scaffolds. The dipping rates were 0.7, 2.7, 5.9 and 9.1  $\text{mm}\cdot\text{min}^{-1}$ . Scale bars represent 500, 200 and 20  $\mu\text{m}$  as indicated in the figure.

| CS content (wt %) | CNTs content (wt %) |     |      |      | CNTs type |
|-------------------|---------------------|-----|------|------|-----------|
|                   | 1 %                 | 5 % | 18 % | 21 % |           |
| 1%                |                     |     |      |      | LN        |
| 4%                |                     |     | X    | X    |           |
| 1%                |                     |     |      |      | SN        |
| 4%                |                     |     | X    | X    |           |

**Figure S4.** Representative SEM images of cross-sectioned MWCNT/CS scaffolds prepared with different content of CS and MWCNTs (either LN or SN), and frozen at a dipping rate of  $5.9 \text{ mm}\cdot\text{min}^{-1}$ . Scale bars represent  $200 \mu\text{m}$  and  $20 \mu\text{m}$  in the inset images.

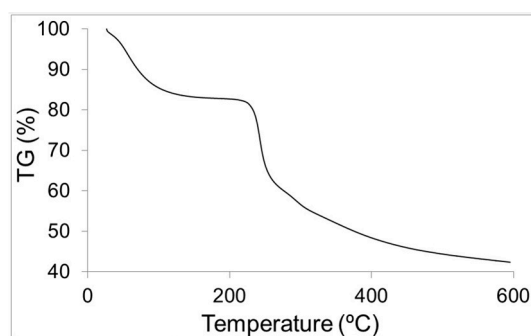

**Figure S5.** TGA thermogram of pristine CS.

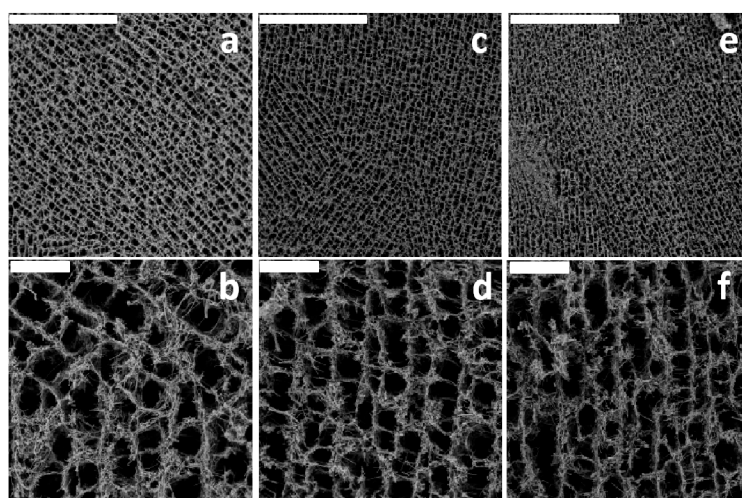

**Figure S6.** Representative SEM images of cross-sectioned CS3LN6 scaffolds: (a,b) before cross-linking, (c,d) after cross-linking and (e,f) after swelling in PBS. Scale bars represent  $200$  (a,c,e) and  $20$  (b,d,f)  $\mu\text{m}$ .

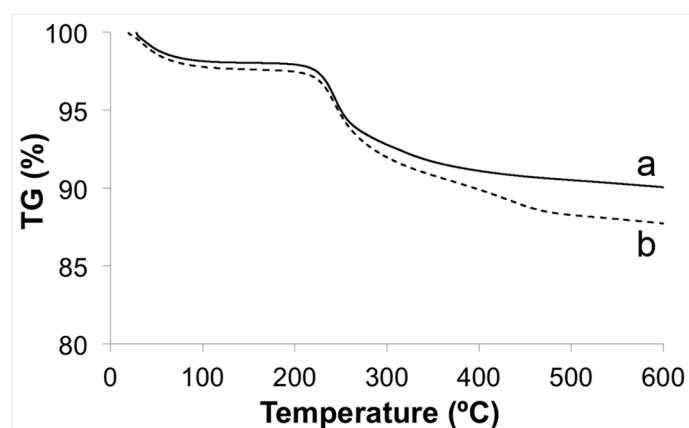

Figure S7. TGA thermograms of CS1LN10 (a) and CS1LN10H (b) scaffolds.

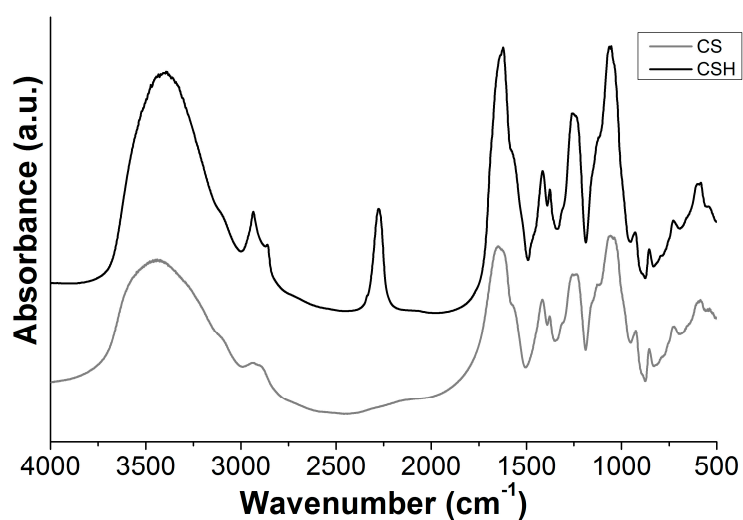

Figure S8. FT-IR spectra of CS in its original form and after cross-linking with HMDI vapors (CSH).

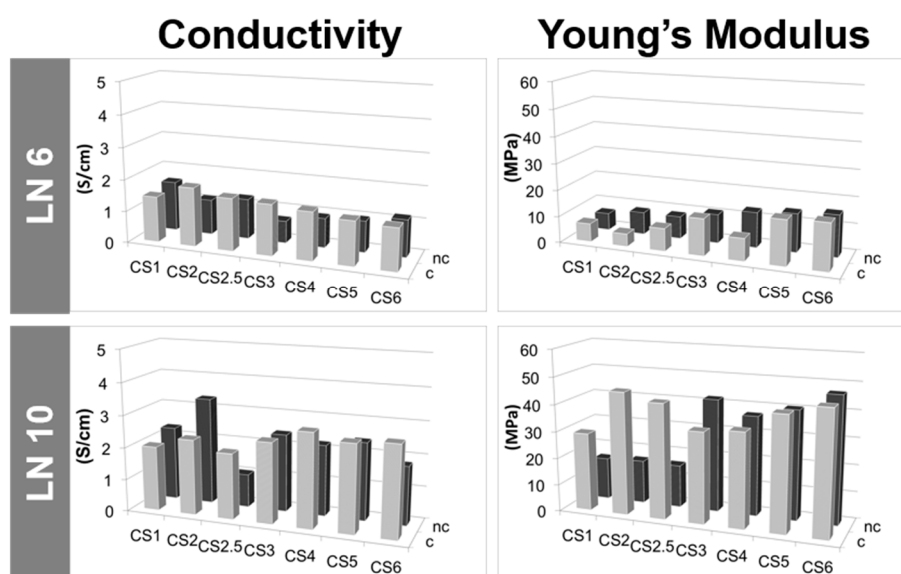

Figure S9. Conductivity and Young's modulus values of CSxLN6 and CSxLN10 scaffolds prepared with different concentration of CS, and either cross-linked (c) or non-cross-linked (nc).

**Table S1.** Conductivity and Young's modulus values of LN-composed MWCNT/CS scaffolds prepared with different concentrations of LN and CS, and either cross-linked (*c*) or non-cross-linked (*nc*).

| Scaffold |          | Conductivity (S/cm) |      | Young's modulus (MPa) |      |
|----------|----------|---------------------|------|-----------------------|------|
| CS (%wt) | LN (%wt) | nc                  | c    | nc                    | c    |
| 1        | 2.5      | 0.34                | 0.26 | 2.4                   | 2.8  |
| 1        | 5        | 0.92                | 1.30 | 6.2                   | 7.1  |
| 1        | 6        | 1.57                | 1.44 | 6.4                   | 9.3  |
| 1        | 8        | 1.48                | 1.93 | 14.0                  | 19.2 |
| 1        | 10       | 2.30                | 2.01 | 15.6                  | 19.3 |
| 1        | 12       | 2.58                | 2.55 | 18.0                  | 20.1 |
| 1        | 15       | 1.85                | 2.37 | 18.7                  | 21.3 |
| 2        | 2.5      | 0.35                | 0.45 | 3.1                   | 5.0  |
| 2        | 5        | 1.09                | 1.20 | 9.1                   | 7.5  |
| 2        | 6        | 1.11                | 1.85 | 8.4                   | 9.5  |
| 2        | 8        | 1.86                | 1.87 | 15.3                  | 18.2 |
| 2        | 10       | 3.32                | 2.34 | 16.1                  | 21.8 |
| 2        | 12       | 3.46                | 2.56 | 33.0                  | 22.4 |
| 2        | 15       | 2.54                | 2.35 | 49.3                  | 48.2 |
| 2.5      | 6        | 1.26                | 1.65 | 8.4                   | 8.6  |
| 2.5      | 10       | 1.03                | 2.04 | 15.8                  | 42.6 |
| 3        | 6        | 0.69                | 1.60 | 10.9                  | 14.0 |
| 3        | 10       | 2.41                | 2.50 | 41.9                  | 33.7 |
| 4        | 2.5      | 0.18                | 0.33 | 9.2                   | 9.3  |
| 4        | 5        | 0.89                | 1.16 | 12.0                  | 11.1 |
| 4        | 6        | 0.92                | 1.51 | 13.3                  | 19.4 |
| 4        | 8        | 1.29                | 2.14 | 18.0                  | 23.0 |
| 4        | 10       | 2.20                | 2.80 | 37.0                  | 35.0 |
| 4        | 12       | 3.82                | 3.20 | 38.0                  | 37.2 |
| 4        | 15       | 3.46                | 2.98 | 49.0                  | 48.2 |
| 5        | 6        | 0.98                | 1.38 | 14.5                  | 17.0 |
| 5        | 10       | 3.55                | 2.70 | 40.5                  | 42.3 |
| 6        | 2.5      | 0.21                | 0.41 | 9.1                   | 13.9 |
| 6        | 5        | 0.97                | 1.00 | 18.9                  | 16.9 |
| 6        | 6        | 1.16                | 1.32 | 15.7                  | 17.6 |
| 6        | 8        | 1.80                | 2.00 | 40.0                  | 40.8 |
| 6        | 10       | 2.21                | 2.80 | 46.9                  | 45.7 |
| 6        | 12       | 3.85                | 3.39 | 55.8                  | 44.5 |
| 6        | 15       | 4.80                | 3.25 | 56.1                  | 54.8 |

**Table S2.** Conductivity and Young's modulus values of SN-composed MWCNT/CS scaffolds prepared with different concentrations of SN and CS, and either cross-linked (*c*) or non-cross-linked (*nc*).

| Scaffold |          | Conductivity (S/cm) |      | Young's modulus (MPa) |      |
|----------|----------|---------------------|------|-----------------------|------|
| CS (%wt) | SN (%wt) | nc                  | c    | nc                    | c    |
| 1        | 2.5      | ---                 | ---  | 1.9                   | 2.7  |
| 1        | 5        | 0.11                | 0.13 | 4.6                   | 5.8  |
| 1        | 6        | 0.23                | 0.20 | 3.7                   | 5.3  |
| 1        | 8        | 0.33                | 0.25 | 10.9                  | 12.3 |
| 1        | 10       | 0.51                | 0.49 | 14.4                  | 22.5 |
| 1        | 12       | 0.71                | 0.77 | 21.8                  | 27.0 |
| 1        | 15       | 1.33                | 1.25 | 33.7                  | 27.8 |
| 4        | 2.5      | ---                 | ---  | 3.2                   | 3.8  |

|   |    |      |      |      |      |
|---|----|------|------|------|------|
| 4 | 5  | 0.02 | 0.06 | 5.1  | 10.9 |
| 4 | 6  | 0.36 | 0.13 | 11.4 | 11.7 |
| 4 | 8  | 0.36 | 0.49 | 13.2 | 13.2 |
| 4 | 10 | 0.35 | 0.66 | 29.2 | 29.3 |
| 4 | 12 | 0.64 | 0.68 | 31.2 | 30.5 |
| 4 | 15 | 0.60 | 0.73 | 41.1 | 42.5 |

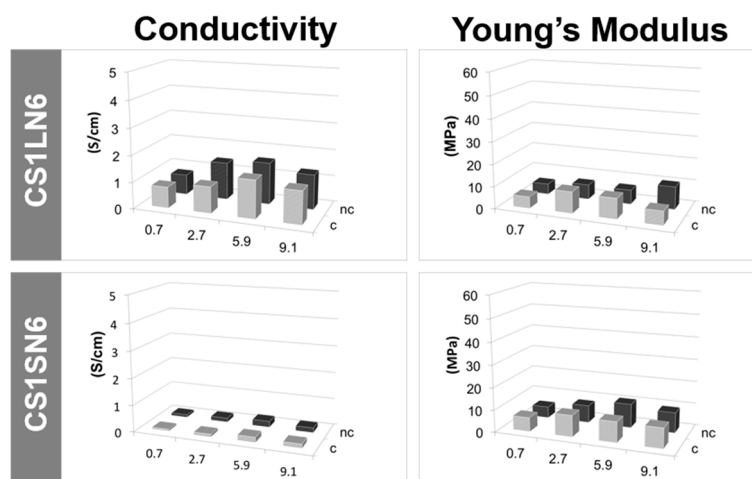

**Figure S10.** Conductivity and Young's modulus values of CS1LN6 and CS1SN6 scaffolds prepared at different dipping rates, and either cross-linked (*c*) or non-cross-linked (*nc*).

**Table S3.** Conductivity and Young's modulus values of CS1LN6 and CS1SN6 scaffolds prepared at different dipping rates, and either cross-linked (*c*) or non-cross-linked (*nc*).

| Scaffold | Dipping Rate | Conductivity (S/cm) |          | Young's modulus (MPa) |          |
|----------|--------------|---------------------|----------|-----------------------|----------|
|          |              | <i>nc</i>           | <i>c</i> | <i>nc</i>             | <i>c</i> |
| CS1LN6   | 0.7          | 0.76                | 0.80     | 4.8                   | 5.2      |
|          | 2.7          | 1.40                | 1.00     | 6.6                   | 9.8      |
|          | 5.9          | 1.57                | 1.44     | 6.4                   | 9.3      |
|          | 9.1          | 1.30                | 1.25     | 10.2                  | 6.3      |
| CS1SN6   | 0.7          | 0.09                | 0.08     | 5.0                   | 6.4      |
|          | 2.7          | 0.15                | 0.10     | 7.8                   | 9.7      |
|          | 5.9          | 0.22                | 0.20     | 10.7                  | 9.3      |
|          | 9.1          | 0.17                | 0.17     | 9.1                   | 9.1      |

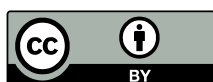

© 2017 by the authors. Submitted for possible open access publication under the terms and conditions of the Creative Commons Attribution (CC-BY) license (<http://creativecommons.org/licenses/by/4.0/>).
